# Supplementary material for: Deletion of KLF10 Leads to Stress-Induced Liver Fibrosis upon High Sucrose Feeding
Source: PubMed Central journal article supplement (PMC7794950; doi:10.3390/ijms22010331), 2020-12-30
Supplement: ijms-22-00331-s001.pdf [file ijms-22-00331-s001.pdf]

## Supplementary data to International Journal of Molecular Sciences

### Deletion of KLF10 Leads to Stress-Induced Liver Fibrosis upon High Sucrose Feeding

Junghoon Lee<sup>1,2</sup>, Ah-Reum Oh<sup>1,2</sup>, Hui-Young Lee<sup>1,2</sup>, Young-Ah Moon<sup>3</sup>, Ho-Jae Lee<sup>1,2,\*</sup>, and  
Ji-Young Cha<sup>1,2,4,\*</sup>

<sup>1</sup> Department of Biochemistry, Lee Gil Ya Cancer and Diabetes Institute, Gachon University College of Medicine, Incheon 21999, Korea; hun21321@naver.com (J.L.); areum1030@naver.com (A.-R.O.); hylee@gachon.ac.kr (H.-Y.L.)

<sup>2</sup> Department of Health Sciences and Technology, GAIHST, Gachon University, Incheon 21999, Korea

<sup>3</sup> Department of Molecular Medicine, Inha University School of Medicine, Incheon 22212, Korea; yamoon15@inha.ac.kr (Y.-A.M.)

<sup>4</sup> Gachon Medical Research Institute, Gachon University Gil Medical Center, Incheon 21565, Korea

\* Correspondence: hojlee@gachon.ac.kr (H.-J.L.); jycha1014@gachon.ac.kr (J.-Y.C.);  
Tel.: +82-32-899-6054 (H.-J.L.); +82-32-899-6070 (J.-Y.C.)

**Supplementary table S1.** Pathological scores for HSD-induced NAFLD.

**Supplementary table S2.** Primer sequences for quantitative real-time PCR.

**Supplementary table S1.** Pathological scores for HSD-induced NAFLD.

| <b>Steatosis</b>     | <b>definition</b>                                                         | <b>Score</b> |
|----------------------|---------------------------------------------------------------------------|--------------|
| 0-3                  | Grade Low- to medium-power evaluation of parenchymal involvement          |              |
|                      | <5%                                                                       | 0            |
|                      | 5-33%                                                                     | 1            |
|                      | 33%-66%                                                                   | 2            |
|                      | >66%                                                                      | 3            |
|                      | Predominant distribution pattern                                          |              |
|                      | Zone3                                                                     | 0            |
| Zone1                | 1                                                                         |              |
| Azpm;                | 2                                                                         |              |
| Panacinar            | 3                                                                         |              |
| <b>Fibrosis</b>      |                                                                           |              |
| 0-4                  | None                                                                      | 0            |
|                      | Perisinusoidal or periportal                                              | 1            |
|                      | Mild, zone 3, perisinusoidal                                              | 1.2          |
|                      | Moderate, zone 3, perisinusoidal                                          | 1.4          |
|                      | Portal/periportal                                                         | 1.6          |
|                      | Perisinusoidal and portal/periportal                                      | 2            |
|                      | Bridging fibrosis                                                         | 3            |
|                      | Cirrhosis                                                                 | 4            |
| <b>Inflammation</b>  |                                                                           |              |
|                      | Lobular inflammation Overall assessment of all inflammatory foci          |              |
|                      | No foci                                                                   | 0            |
|                      | <2 foci per 200 field                                                     | 1            |
|                      | 2-4 foci per 200 field                                                    | 2            |
|                      | >4 foci per 200 field                                                     | 3            |
|                      | Microgranulomas Small aggregates of macrophages                           |              |
|                      | Absent                                                                    | 0            |
|                      | Present                                                                   | 1            |
|                      | Large lipogranulomas Usually in portal areas or adjacent to central veins |              |
|                      | Absent                                                                    | 0            |
|                      | Present                                                                   | 1            |
|                      | Portal inflammation Assessed from low magnification                       |              |
|                      | None to minimal                                                           | 0            |
| Greater than minimal | 1                                                                         |              |
| <b>Cell injury</b>   |                                                                           |              |
|                      | Ballooning*                                                               |              |
|                      | None                                                                      | 0            |
|                      | Few balloon cells                                                         | 1            |
|                      | Many cells/prominent ballooning                                           | 2            |
|                      | Acidophil bodies                                                          |              |
|                      | None to rare                                                              | 0            |
|                      | Many                                                                      | 1            |
|                      | Pigmented macrophages                                                     |              |
|                      | None to rare                                                              | 0            |
|                      | Many                                                                      | 1            |
|                      | Megamitochondria*                                                         |              |
|                      | None to rare                                                              | 0            |
|                      | Many                                                                      | 1            |

**Supplementary table S2.** Primer sequences for quantitative real-time PCR

| Gene symbol                    | Forward primers (5' to 3') | Reverse primers (5' to 3') |
|--------------------------------|----------------------------|----------------------------|
| <i>Apob</i>                    | CGTGGGCTCCAGCATTCTA        | TCACCAGTCATTTCTGCCTTTG     |
| <i>Atf3</i>                    | TGGAGATGTCAGTCACCAAGTCT'   | GCAGCAGCAATTTTATTTCTTTCT'' |
| <i>Catalase</i>                | CCGAGTCTCTCCATCAGGTTT      | TCATGTGCCGGTGACCAT         |
| <i>Cd36</i>                    | GGAAGTGTGGGCTCATTGC        | CATGAGAATGCCTCCAAACAC      |
| <i>Chop</i>                    | CACCACACCTGAAAGCAGAAC      | GGTGAAAGGCAGGGACTCA        |
| <i>Coll1a1</i>                 | CCTGAGTCAGCAGATTGAGAACA    | CCAGTACTCTCCGCTCTTCCA      |
| <i>Fas</i>                     | GCTGCGGAAACTTCAGGAAAT      | AGAGACGTGTCACTCCTGGACTT    |
| <i>Gadd34</i>                  | GGCGGCTCAGATTGTTCAA        | GAAGTGTACCTTCCGAGCTTTTAGAG |
| <i>Mcp1</i>                    | TCTGGGCCTGCTGTTTACA        | CCAGCCTACTCATTGGGATCA      |
| <i>Mtp</i>                     | AGCCAGTGGGCATAGAAAATC      | GGTCACTTTACAATCCCCAGA      |
| <i>Noxa</i>                    | TGGGAAGTCGCAAAGAGCA        | CCCTGCTCAGGGAACCAAAA       |
| <i>Nqo1</i>                    | CCATGGCGGCGAGAAG           | TTCATGGCGTAGTTGAATGATGT    |
| <i>Nrf2</i>                    | CCCGGTTGCCACATTC           | TGTCTCTGCCAAAAGCTGCAT      |
| <i>Pai1</i>                    | GCAAAAGGTCAGGATCGAGGTA     | GTGCCGAACCACAAAGAGAAAG     |
| <i>Puma</i>                    | GCGGCGGAGACAAGAAGA         | AGTCCCATGAAGAGATTGTACATGAC |
| <i>Smad3</i>                   | GTAATGCACTTGGTGTTCACGTT    | TGAAGAAGCTCAAGAAGACGGG     |
| <i>Sod2</i>                    | CAGACCTGCCTTACGACTATGG     | CTCGGTGGCGTTGAGATTGTT      |
| <i>Srxn1</i>                   | CACAACGTACCAATCGC          | CCTTTGATCCAGAGGACGTC       |
| <i>Tgfb1</i>                   | GCAGTGGCTGAACCAAGGA        | AGAGCAGTGAGCGCTGAATC       |
| <i>Tnfa</i>                    | CTGAGGTCAATCTGCCCAAGTAC    | CTTACAGAGCAATGACTCCAAAG    |
| <i><math>\alpha</math>-Sma</i> | CACGGCATCATCACCAACTG       | GGCCACACGAAGCTCGTTAT       |
